# Supplementary material
Source: PubMed Central journal article supplement (PMC7269574)
Supplement: jci-130-125607-s018.pdf [file jci-130-125607-s018.pdf]

Supplemental Table 1. Human HLA binding prediction sites

| Peptide No | GALNS region | Sequence                                                         | MHC molecule (HLA)                           |
|------------|--------------|------------------------------------------------------------------|----------------------------------------------|
| A2         | 44-63        | <b>GD</b> LG <b>VY</b> GE <b>PS</b> RE <b>TP</b> NLDRMA          | A*30:02, A*02:01, B*35:01, B*40:01           |
| B3         | 101-120      | <b>NA</b> HAR <b>NA</b> YTPQEIVGGIPDS                            | A*30:02,                                     |
| C4         | 163-182      | <b>PN</b> CH <b>FG</b> PYDNKARNIPVYR                             | B*35:01,                                     |
| D9         | 206-225      | TQ <b>IY</b> L <b>QE</b> AL <b>DF</b> IK <b>RQ</b> ARHHP         | A*23:01, A*24:02, A*02:03, A*02:01, A*31:01, |
| E8         | 226-245      | <b>FF</b> LY <b>WA</b> VD <b>ATH</b> AP <b>V</b> YASKPF          | B*35:01, B:53:01, A*02:01, A*68:02           |
| F5         | 241-260      | ASKP <b>FL</b> GT <b>SQ</b> R <b>GR</b> YGD <b>AV</b> RE         | A*30:02,                                     |
| G6         | 291-310      | AALISAPEQ <b>GS</b> NG <b>PFL</b> CG <b>K</b>                    | A*11:01, A*03:01,                            |
| H7         | 347-366      | <b>TT</b> SL <b>AL</b> AG <b>L</b> TPPSDRAID <b>GL</b>           | A*68:02,                                     |
| I10        | 473-492      | QQHQEALVPA <b>QP</b> QL <b>NVC</b> N <b>WA</b>                   | B*53:01                                      |
| J1         | 503-522      | KL <b>GG</b> KL <b>TP</b> PE <b>SIP</b> KK <b>CL</b> W <b>SH</b> | A*11:01, A*03:01, B*57:01, B*58:01           |

Percentile rank: 1% , IC50: 50 nM, <200 nM
